# Supplementary material for: Effects of Probiotic NVP-1704 on Mental Health and Sleep in Healthy Adults: An 8-Week Randomized, Double-Blind, Placebo-Controlled Trial
Source: MDPI journal article supplement (doi:10.3390/nu13082660), 2021-07-30
Supplement: s1 [file s1]

**Table S1.** The gut microbiota composition ratio in the experimental and control groups after eight weeks of intervention.

| Taxon name                            | Composition (%)             |                        |
|---------------------------------------|-----------------------------|------------------------|
|                                       | Experimental group (n = 63) | Control group (n = 59) |
| Phylum                                |                             |                        |
| <i>Actinobacteria</i> *               | 2.52 (1.26-6.27)*           | 1.57 (0.52-4.68)       |
| <i>Bacteroidetes</i>                  | 26.89 (15.08-50.70)         | 31.53 (14.98-50.06)    |
| <i>Firmicutes</i>                     | 57.77 (40.35-70.86)         | 55.08 (29.26-70.68)    |
| <i>Proteobacteria</i>                 | 1.59 (0.74-3.87)            | 1.60 (0.45-5.44)       |
| <i>Tenericutes</i>                    | 0.02 (0.01-0.25)            | 0.01 (0.00-0.10)       |
| <i>Verrucomicrobia</i>                | 0.02 (0.00-0.16)            | 0.02 (0.00-0.19)       |
| Family                                |                             |                        |
| <i>Acidaminococcaceae</i>             | 0.08 (0.00-0.68)            | 0.03 (0.00-0.55)       |
| <i>Akkermansiaceae</i>                | 0.02 (0.00-0.16)            | 0.02 (0.00-0.15)       |
| <i>Bacteroidaceae</i>                 | 15.15 (5.96-37.22)          | 14.08 (5.63-34.09)     |
| <i>Bifidobacteriaceae</i> *           | 1.84 (0.74-5.03)            | 1.16 (0.43-3.78)       |
| <i>Clostridiaceae</i>                 | 0.11 (0.03-0.40)            | 0.04 (0.02-0.25)       |
| <i>Enterobacteriaceae</i>             | 0.25 (0.07-0.86)            | 0.35 (0.07-1.47)       |
| <i>Erysipelotrichaceae</i>            | 0.60 (0.18-1.33)            | 0.50 (0.19-0.92)       |
| <i>Lachnospiraceae</i>                | 12.88 (7.00-21.75)          | 12.24 (8.23-16.96)     |
| <i>Lactobacillaceae</i>               | 0.15 (0.03-0.53)            | 0.08 (0.01-0.51)       |
| <i>Muribaculaceae</i>                 | 0.11 (0.05-0.30)            | 0.13 (0.05-0.48)       |
| <i>Peptostreptococcaceae</i>          | 0.42 (0.10-2.80)            | 0.30 (0.10-1.38)       |
| <i>Porphyromonadaceae</i> *           | 0.62 (0.19-1.95)            | 1.56 (0.33-3.58)       |
| <i>Prevotellaceae</i>                 | 1.10 (0.07-3.91)            | 1.05 (0.07-3.60)       |
| <i>Rikenellaceae</i>                  | 1.36 (0.21-3.27)            | 1.50 (0.35-4.74)       |
| <i>Ruminococcaceae</i>                | 24.23 (13.32-35.43)         | 19.46 (9.19-37.00)     |
| <i>Veillonellaceae</i>                | 0.66 (0.09-1.71)            | 0.43 (0.03-2.44)       |
| Genus                                 |                             |                        |
| <i>Akkermansia</i>                    | 0.02 (0.00-0.16)            | 0.02 (0.00-0.15)       |
| <i>Alistipes</i>                      | 1.36 (0.20-3.20)            | 1.38 (0.35-4.74)       |
| <i>Anaerostipes</i>                   | 0.41 (0.12-0.67)            | 0.39 (0.22-0.82)       |
| <i>Bacteroides</i>                    | 15.15 (5.92-37.07)          | 13.96 (5.56-34.00)     |
| <i>Bifidobacterium</i> *              | 1.84 (0.74-5.01)            | 1.16 (0.43-3.76)       |
| <i>Blautia</i>                        | 1.55 (0.78-2.78)            | 1.26 (0.72-2.94)       |
| <i>Clostridium</i>                    | 0.11 (0.03-0.40)            | 0.04 (0.02-0.25)       |
| <i>Dialister</i>                      | 0.07 (0.02-0.95)            | 0.15 (0.01-1.27)       |
| <i>Escherichia</i>                    | 0.21 (0.07-0.64)            | 0.26 (0.06-1.17)       |
| <i>Eubacterium_g23</i>                | 0.65 (0.09-3.17)            | 0.57 (0.08-2.60)       |
| <i>Faecalibacterium</i>               | 7.17 (2.36-14.63)           | 6.11 (2.00-10.48)      |
| <i>Oscillibacter</i>                  | 1.38 (0.60-3.44)            | 1.68 (0.59-3.32)       |
| <i>PAC000661_g (Oscillospiraceae)</i> | 0.04 (0.01-0.53)            | 0.07 (0.01-0.84)       |
| <i>Parabacteroides</i> *              | 0.61 (0.19-1.94)            | 1.56 (0.33-3.48)       |
| <i>Prevotella</i>                     | 0.32 (0.04-2.66)            | 0.62 (0.07-2.60)       |
| <i>Romboutsia</i>                     | 0.27 (0.07-1.62)            | 0.24 (0.05-0.95)       |
| <i>Roseburia</i> *                    | 2.25 (0.61-3.77)            | 1.30 (0.43-2.19)       |

|                        |                  |                  |
|------------------------|------------------|------------------|
| <i>Ruminococcus</i>    | 0.27 (0.08-1.25) | 0.20 (0.03-0.90) |
| <i>Ruminococcus_g2</i> | 0.46 (0.05-1.43) | 0.22 (0.04-1.99) |
| <i>Subdoligranulum</i> | 1.59 (0.50-4.20) | 1.88 (0.65-3.91) |

Data are presented as median (percentile 25-75). One tailed Mann-Whitney test was performed. # $p < 0.05$  vs. placebo group.
